# Supplementary material for: Thioredoxin-Interacting Protein Promotes Phagosomal Acidification Upon Exposure to Escherichia coli Through Inflammasome-Mediated Caspase-1 Activation in Macrophages
Source: Front Immunol. 2019 Nov 12;10:2636. doi: 10.3389/fimmu.2019.02636 (PMC6861186; doi:10.3389/fimmu.2019.02636)
Supplement: Supplementary file 2 [file Data_Sheet_1.pdf]

# Supplementary Material

## Supplementary Figure

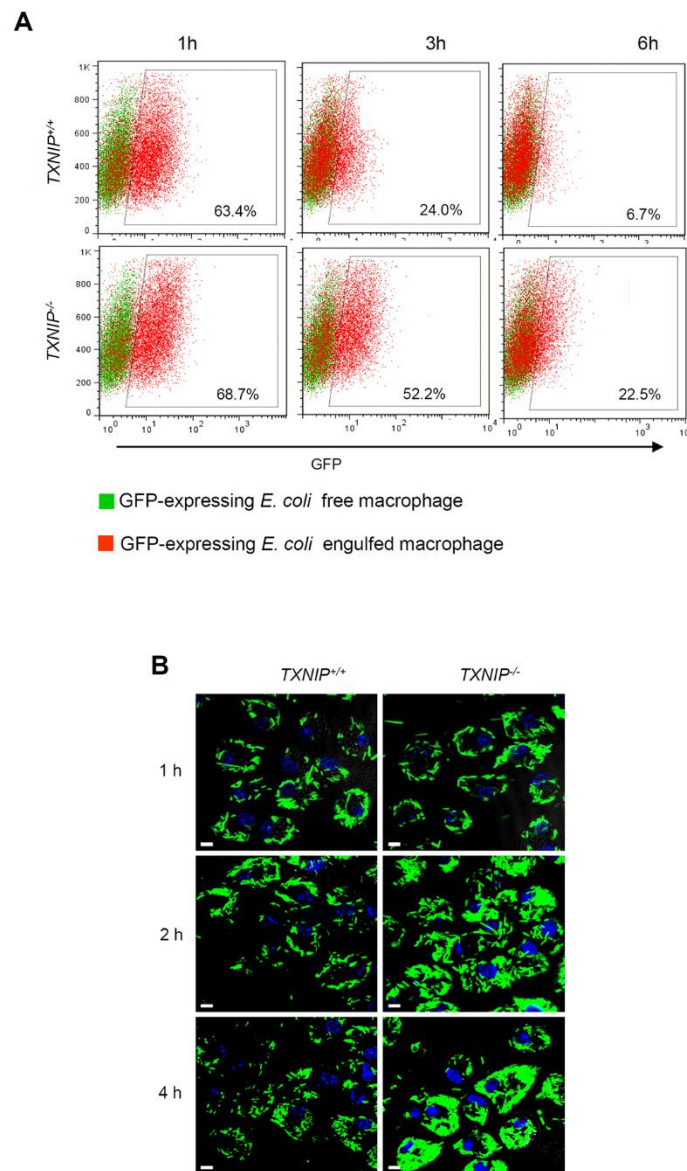

**Supplementary Figure 1.** Delay in the clearance of bacteria by *Txnip* KO macrophages. (A) FACS analysis showing the proportion of WT and *Txnip* KO mouse peritoneal macrophages, which retained GFP-expressing *E. coli* at the indicated time points after treatment with bacteria at an MOI of 10. (B) Representative images of WT and *Txnip* KO mouse peritoneal macrophages at the indicated time points after treatment with GFP-expressing *E. coli* at an MOI of 50, without removal of extracellular bacteria. Scale bars, 20  $\mu$ m.

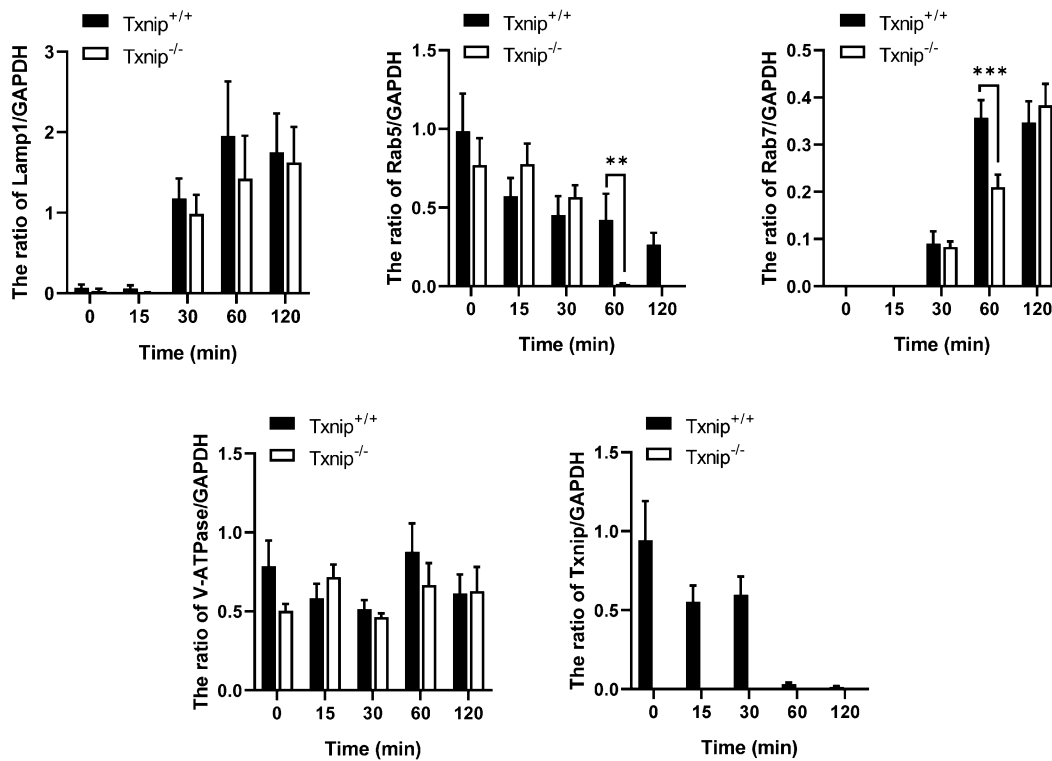

**Supplementary Figure 2.** Quantification data of Lamp1, Rab5, Rab7, V-ATPase, and Txnip determined using western blotting data presented in Figure 2A. Data are expressed as mean  $\pm$  SD (n = 3, \*\*P < 0.01, \*\*\*P < 0.001, compared with WT).

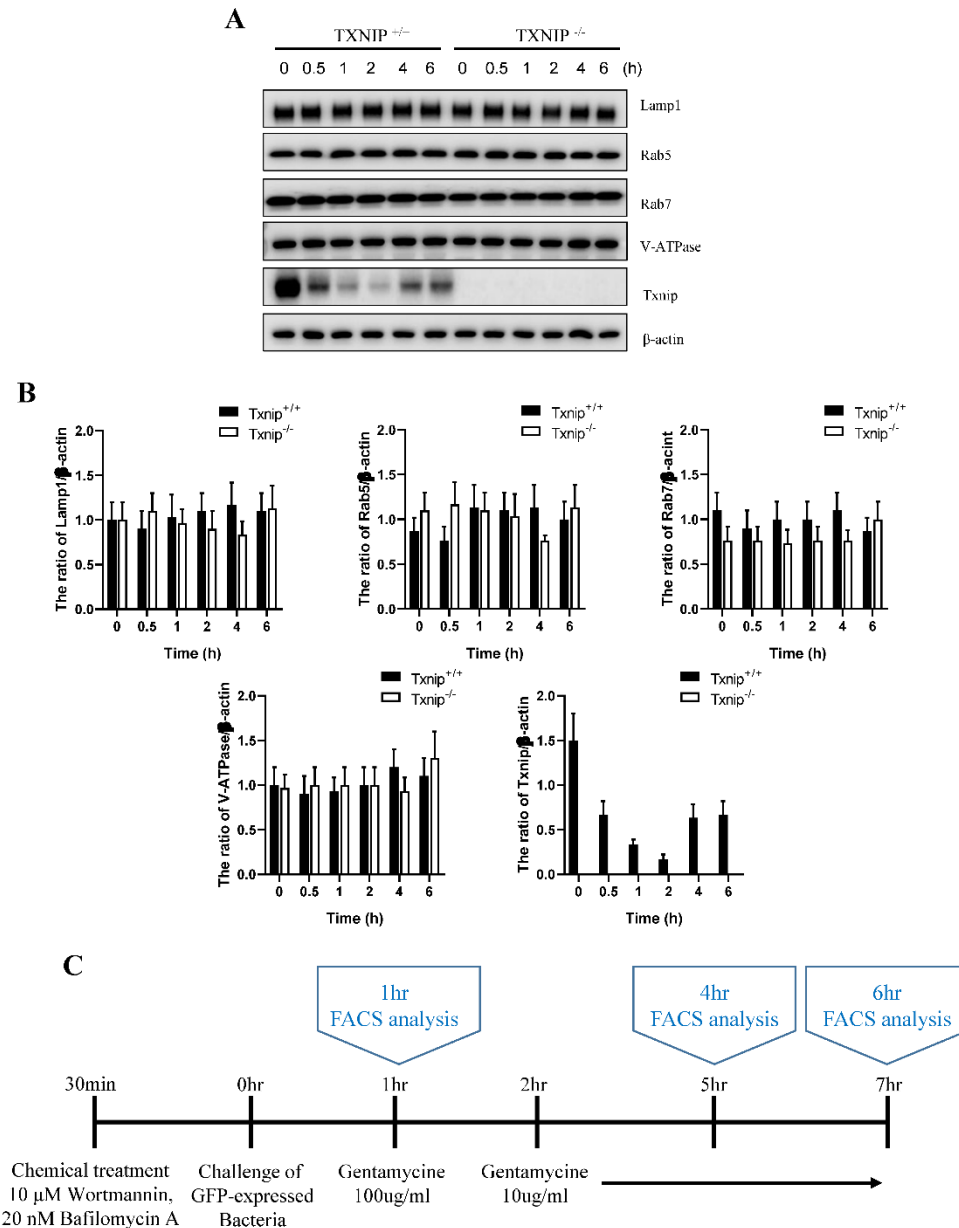

**Supplementary Figure 3.** (A) Expression of proteins related to phagosome maturation from WT and *Txnip* KO mouse peritoneal macrophages treated with *E. coli* for the indicated times. (B) The quantification data of Lamp1, Rab5, Rab7, V-ATPase, and Txnip based on western blotting data presented in (A). (C) The experimental scheme used for GFP-expressing *E. coli* treatment, removal of extracellular bacteria, and wortmannin or bafilomycin A treatment.

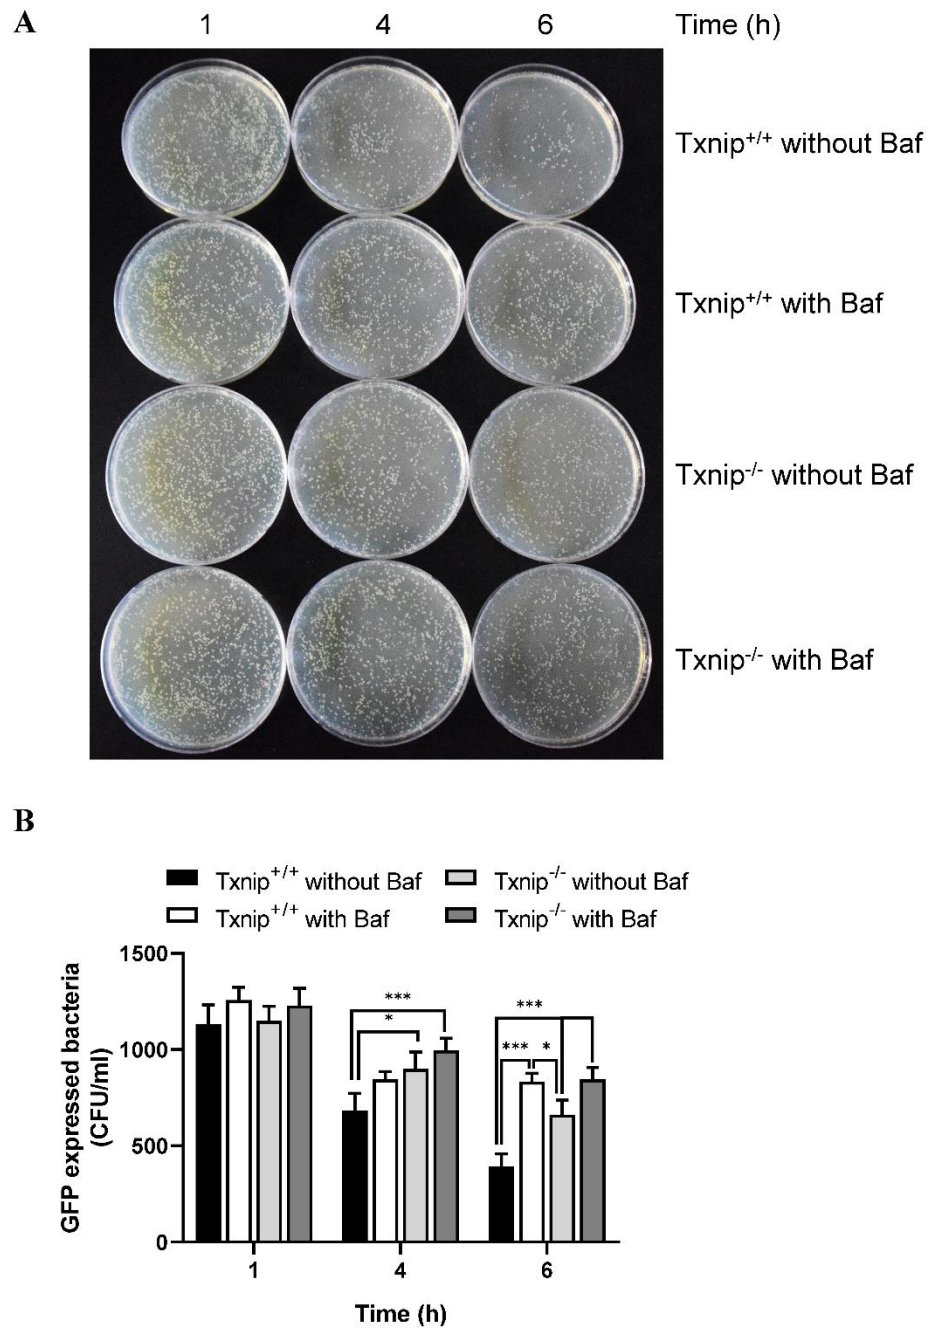

**Supplementary Figure 4.** (A) Representative LB agar plates after overnight incubation with cell extracts derived from WT and *Txnip* KO peritoneal macrophages incubated with GFP-expressing *E. coli* for the indicated periods. WT and *Txnip* KO peritoneal macrophages treated with bafilomycin A (20 nM) before incubation with GFP-expressing *E. coli*. (B) CFUs on LB agar plates after overnight incubation with cell extracts derived from WT and *Txnip* KO mouse peritoneal macrophages incubated with *E. coli* for the indicated times. Data are expressed as mean  $\pm$  SD ( $n = 3$ ,  $*P < 0.05$ ,  $***P < 0.001$ , compared with WT).

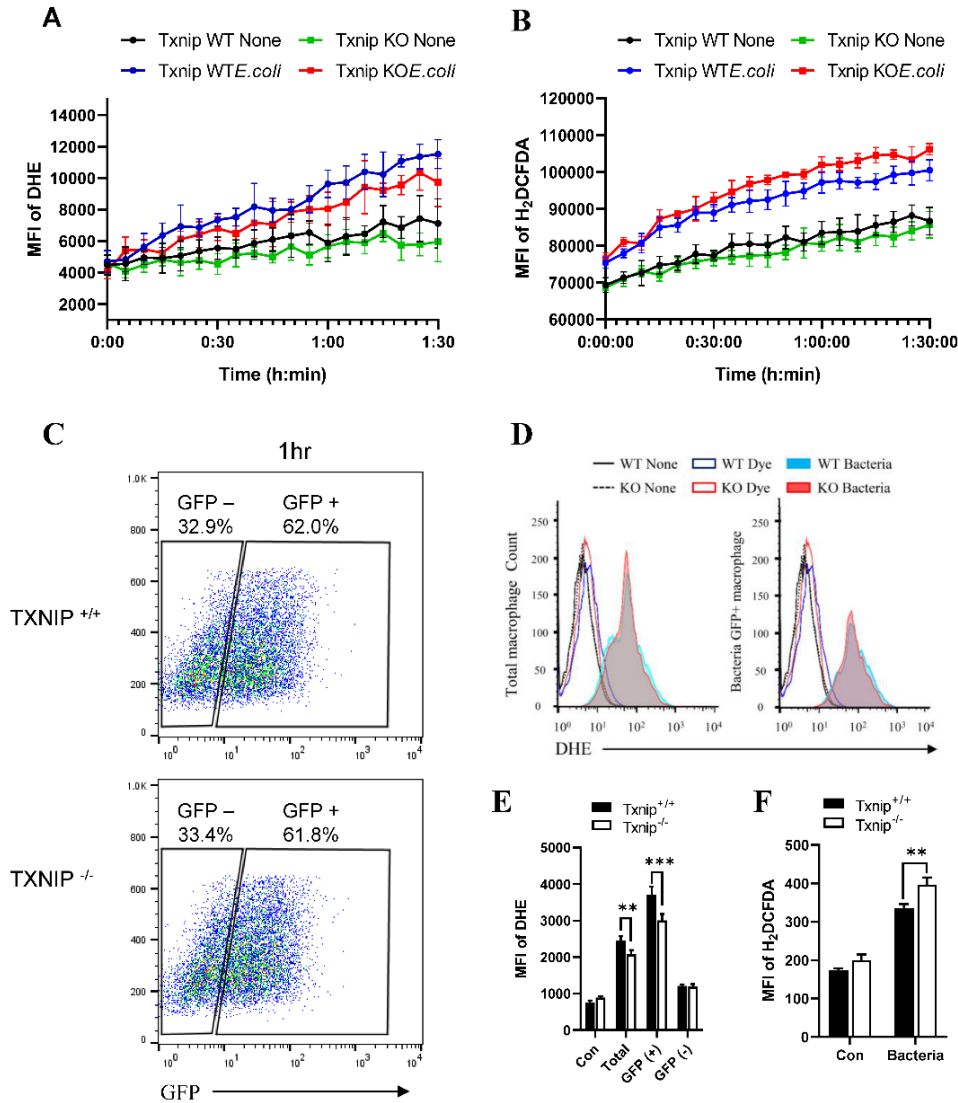

**Supplementary Figure 5.** (A) Mean fluorescence intensity (MFI) of DHE showing the ratio of superoxide level in WT and *Txnip* KO mouse peritoneal macrophages after treatment with *E. coli* at an MOI of 20 ( $n = 6$ ). (B) The MFI of H<sub>2</sub>DCFDA dye showing the ratio of superoxide level in WT and *Txnip* KO mouse peritoneal macrophages after treatment with *E. coli* at an MOI of 20 ( $n = 6$ ). (C) FACS analysis showing the proportion of WT and *Txnip* KO mouse peritoneal macrophages, which retained GFP-expressing *E. coli* 1 h after treatment with GFP-expressing *E. coli* at an MOI of 20. (D) Distribution of WT and *Txnip* KO mouse peritoneal macrophages based on the intensity of DHE at 1 h after treatment with GFP-expressing *E. coli* at an MOI of 20. (E) The MFI of DHE in the total, GFP-positive, and GFP-negative WT and *Txnip* KO mouse peritoneal macrophages after treatment with GFP-expressing *E. coli* at an MOI of 20 for 1 h ( $n = 3$ ). (F) The MFI of H<sub>2</sub>DCFDA in WT and *Txnip* KO mouse peritoneal macrophages after treatment with *E. coli* at an MOI of 20 for 1 h ( $n = 3$ ).

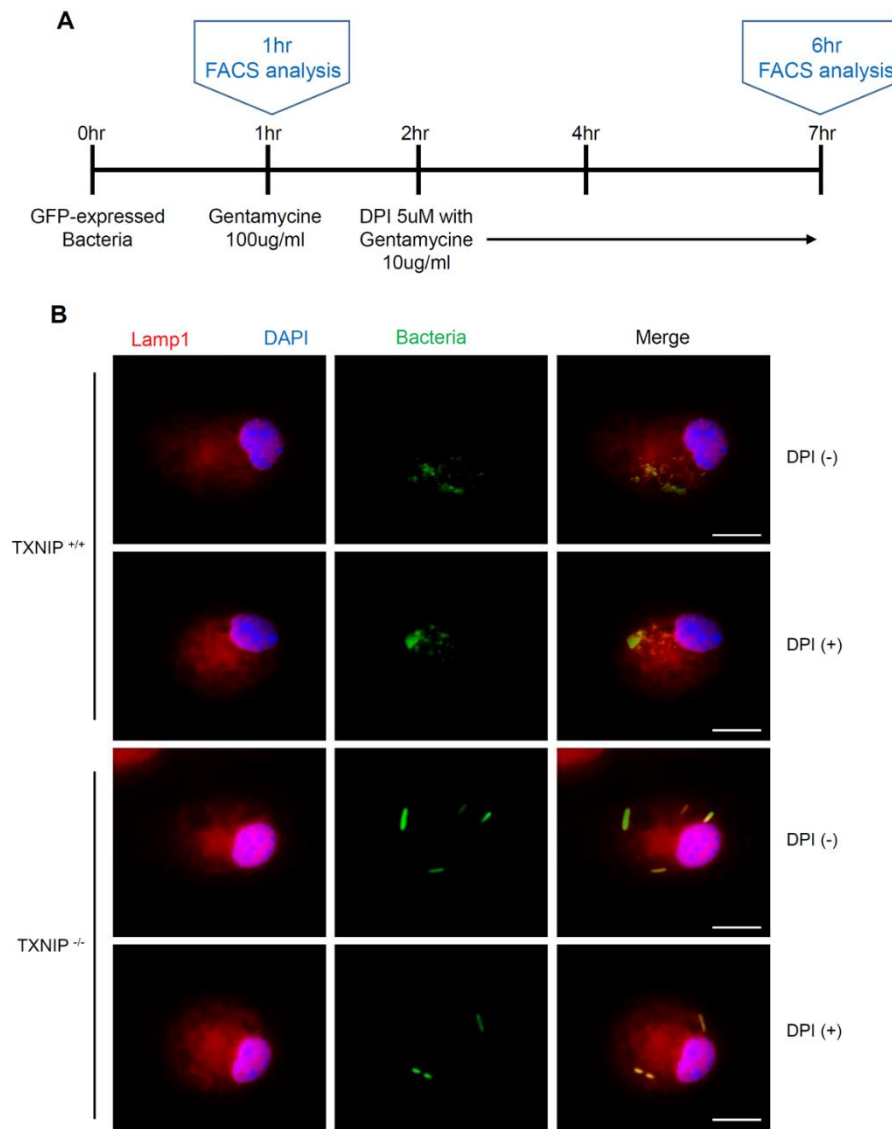

**Supplementary Figure 6.** (A) Experimental scheme used for GFP-expressing *E. coli* treatment, removal of extracellular bacteria, and DPI treatment. (B) Representative images of bacteria-laden WT and *Txnip* KO mouse macrophages 6 h after 1 h of treatment with GFP-expressing *E. coli*, with or without DPI treatment, and removal of extracellular bacteria. Scale bar, 10  $\mu$ m.

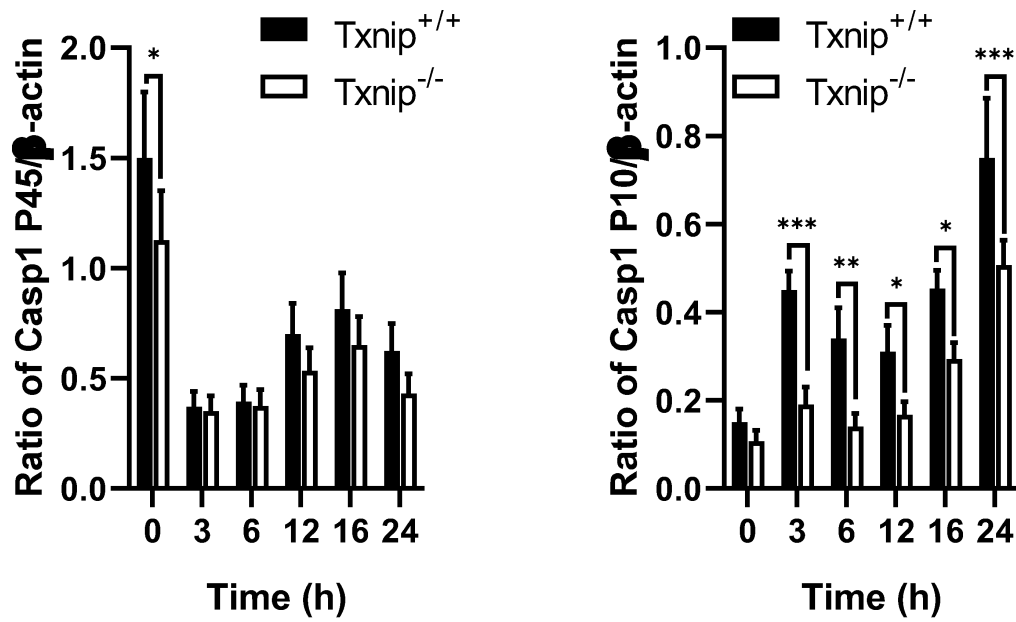

**Supplementary Figure 7.** Quantification of Casp1 P45 and Casp1 P10 using western blotting data shown in Figure 4B. Data are expressed as mean  $\pm$  SD (n = 3, \*P < 0.05, \*\*P < 0.01, \*\*\*P < 0.001, compared with WT).
